# Supplementary material for: Fluorometric immunocapture assay for the specific measurement of matrix metalloproteinase-9 activity in biological samples: application to brain and plasma from rats with ischemic stroke
Source: Springer Nature journal article supplement (doi:10.1186/1756-6606-6-14), 2013-03-23

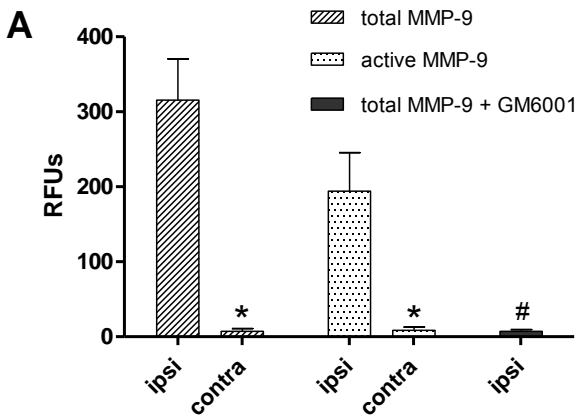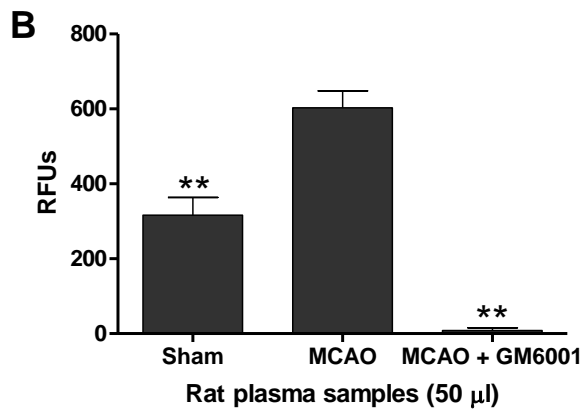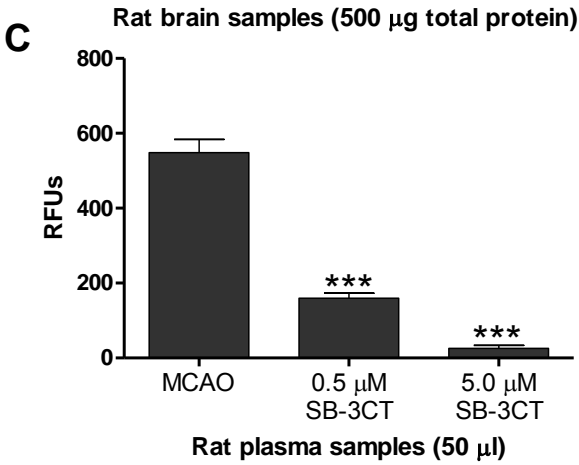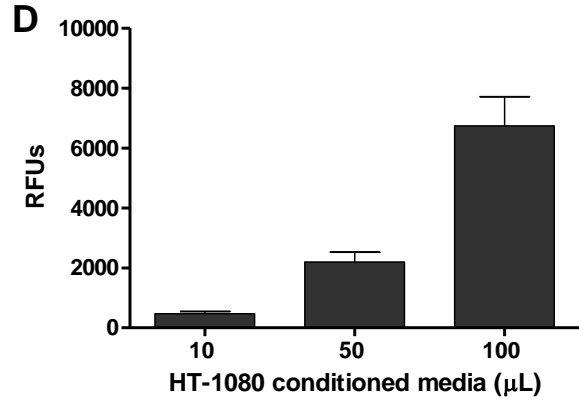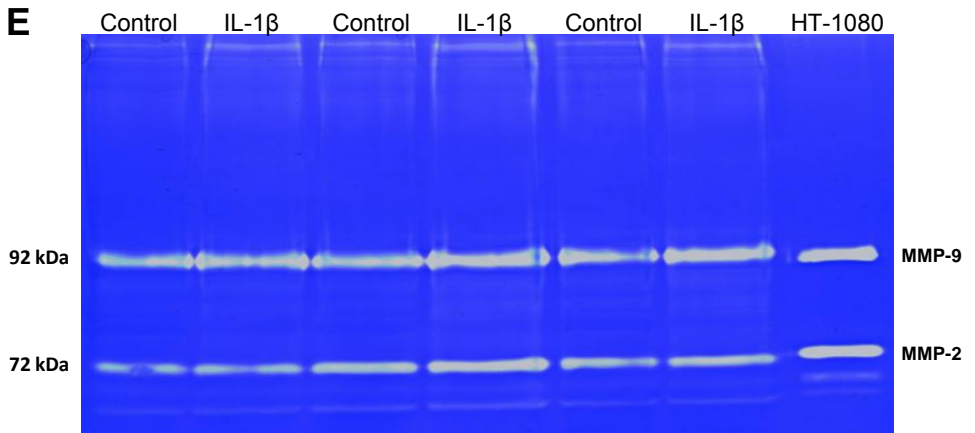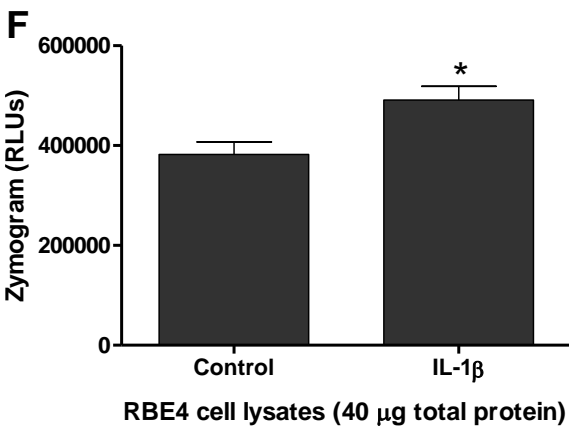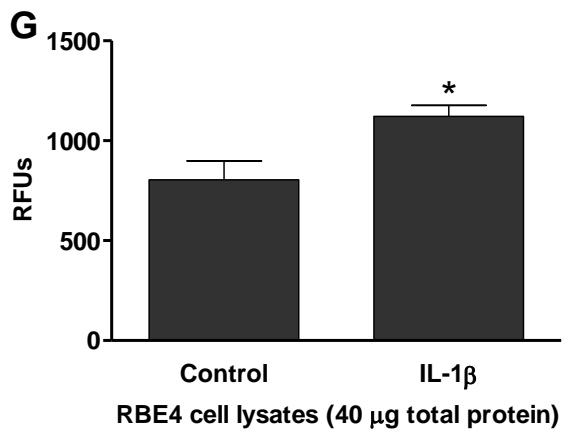

Supplement: 13041_2012_203_MOESM4_ESM.pdf [file 13041_2012_203_MOESM4_ESM.pdf]
